# Supplementary material
Source: Springer Nature journal article supplement (https://www.springermedizin.de/resource/supplementary/12875_2011_737_MOESM2_ESM.pdf/9435204)
Supplement: MOESM2 [file 9435204]

# Study design of the feasibility study

Marburg  
(80.000 inhabitants)

Gießen  
(75.000 inhabitants)

Shared development of  
the CHD pathway

GPs and  
cardiologists

Qualitative Evaluation

Study arm A:  
Developer

6 GPs

Study arm B:  
User

6 GPs

Study arm C:  
Control

6 GPs

Consecutive recruitment of CHD patients in each study arm

Quantitative Evaluation
